# Supplementary material
Source: PubMed Central journal article supplement (PMC4040557)
Supplement: 1322200111_pnas.201322200SI.pdf [file 1322200111_pnas.201322200SI.pdf]

# Supporting Information

Sysoeva et al. 10.1073/pnas.1322200111

## SI Materials and Methods

**Construction of Strains and Growth Conditions.** Plasmids were constructed and maintained using standard molecular cloning protocols and *Escherichia coli* strain DH5 $\alpha$  (1). All changes to the Yuke substrate were introduced by site-directed mutagenesis of either *Bacillus subtilis* integration or *E. coli* expression vectors and confirmed by sequencing. Strains are listed in Table S1, and oligonucleotides used in this work are summarized in Table S2. For secretion assays and analyses of cellular content, *B. subtilis* strains were grown in LB medium supplemented with an inducer at specified concentrations when needed. The antibiotics ampicillin (100  $\mu\text{g}/\text{mL}$ ), kanamycin (5 or 50  $\mu\text{g}/\text{mL}$  for *B. subtilis* and *E. coli*, respectively), spectinomycin (100  $\mu\text{g}/\text{mL}$ ), and erythromycin (MLS) (1  $\mu\text{g}/\text{mL}$ ) plus lincomycin (25  $\mu\text{g}/\text{mL}$ ) were included when appropriate. *B. subtilis* strains were created by transforming domesticated strain PY79 by natural competence with the listed plasmid for double crossover (2).

**Cloning, Expression, and Purification of the Modified Yuke Variants.** The coding sequence of YukeE was cloned into pET28b+ vector

(Novagen) and *B. subtilis* into integration vector pDR111 [gift of D. Rudner (Harvard Medical School, Boston)]. Recombinant protein for purification was produced by overexpression in *E. coli* strain BL21(DE3) upon induction in LB medium with 0.5–1 mM isopropyl  $\beta$ -D-1-thiogalactopyranoside at an OD<sub>600</sub> of  $\sim$ 0.6 for 16 h at 30  $^{\circ}\text{C}$ . The cells were lysed using a TS series Cell Disruptor (Pressure Biosciences Inc.) at 17,000 psi in lysis buffer [50 mM Hepes pH 7.5, 250 mM NaCl, 5% (wt/vol) glycerol] supplemented with a complete protease inhibitor mixture tablet (Roche). Protein was purified from the cell lysate using nickel affinity chromatography in lysis buffer and elution into the same buffer supplemented with 0.5 M imidazole. Eluted YukeE protein was then dialyzed into 25 mM Hepes pH 7.5, 20 mM NaCl, 5% (wt/vol) glycerol. When required, hexahistidine tag was cleaved with thrombin overnight at 25  $^{\circ}\text{C}$  during dialysis (3 MWCO tubing, Pall) into an appropriate buffer, leaving extra Gly–Ser–His residues. The thrombin was captured by incubating the preparation with p-Aminobenzamidine–Agarose (Sigma-Aldrich) in the same buffer.

1. Sambrook J, Fritsch EF, Maniatis T (1989) *Molecular Cloning: A Laboratory Manual* (Cold Spring Harbor Lab Press, Cold Spring Harbor, NY).

2. Harwood CR, Cutting SM, eds (1990) *Molecular Biological Methods for Bacillus* (Wiley, New York).

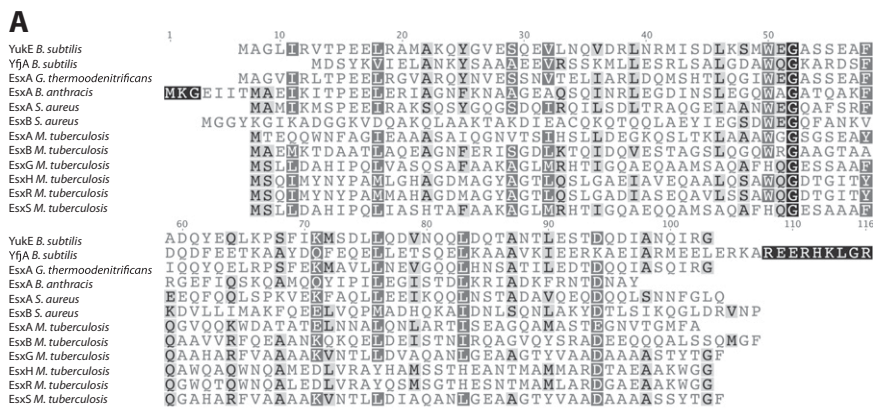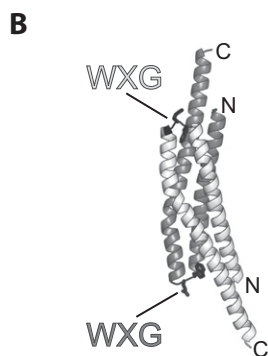

**Fig. S1.** Substrates of the ESX secretion systems—WXG100 proteins. (A) Sequence alignment of YukE substrate of *B. subtilis* and other WXG proteins including prototypical ESX substrates EsxA (ESAT-6) and EsxB (CFP-10) of *Mycobacterium tuberculosis*. (B) WXG proteins possess a conserved helix-turn-helix fold and form stable dimers. The 3D model of YukE monomer in cartoon representation with the defining WXG motif is given in black stick representation. The model was built in Swiss-PDBViewer (1, 2) via threading of the YukE sequence to the structure of EsxA from *Geobacillus thermodenitrificans* [Protein Data Bank (PDB) ID code 3ZBH]. Structural illustrations in this and other figures are prepared using PyMOL software (The PyMOL Molecular Graphics System, Version 1.5.0.4, Schrödinger, LLC).

1. Guex N, Peitsch MC (1997) SWISS-MODEL and the Swiss-PdbViewer: An environment for comparative protein modeling. *Electrophoresis* 18(15):2714–2723.
2. Guex N, Peitsch MC, Schwede T (2009) Automated comparative protein structure modeling with SWISS-MODEL and Swiss-PdbViewer: A historical perspective. *Electrophoresis* 30(Suppl 1): S162–S173.

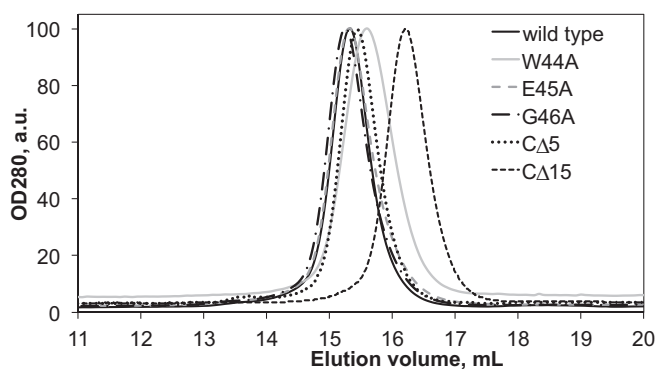

**Fig. S2.** WXG-substituted and C-terminally truncated YukE variants form dimers in vitro. Size-exclusion chromatography (SEC) analyses of recombinant YukE substrates. Recombinant wild-type and mutated YukE proteins were analyzed on a Superdex200 column that was calibrated using BioRad gel filtration standards. The estimated molecular weights and Stokes radii are given in Fig. S3.

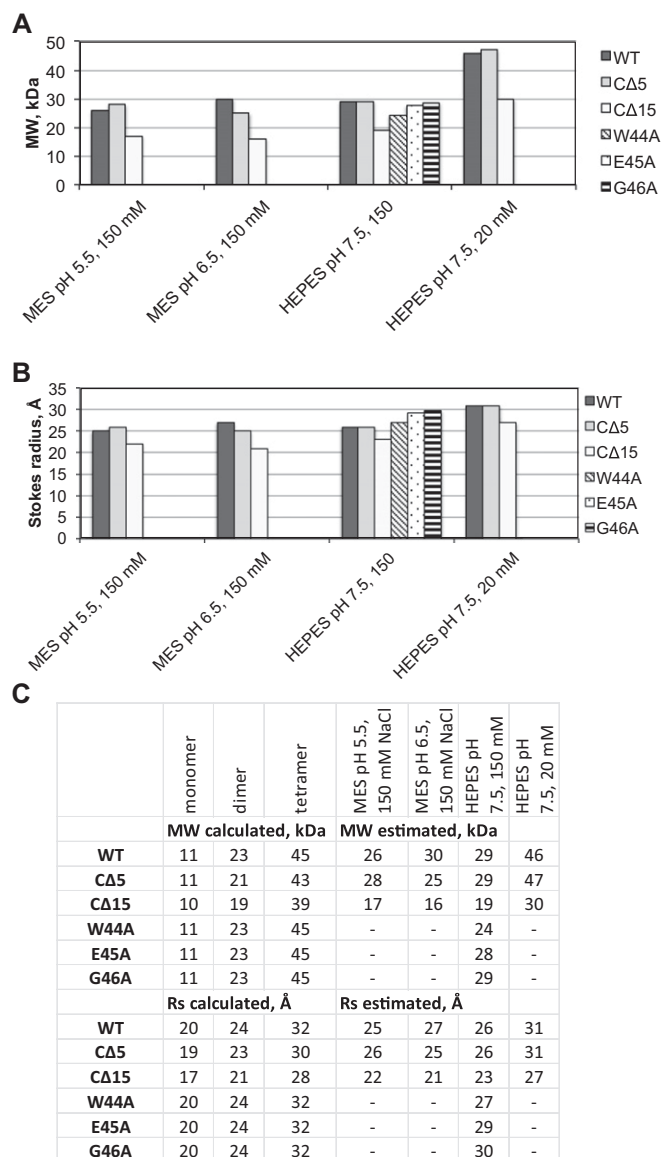

**Fig. S3.** In vitro dimerization of recombinant YukeE protein under different pH and salt conditions. (A) Estimating molecular weights of YukeE variants using SEC. YukeE remains in the dimeric form in the tested pH range from 5.5 to 7.5 (buffer is indicated; NaCl is 20 mM or 150 mM). At low-salt conditions, YukeE species shifts to a higher apparent molecular weight, indicating that it either is forming complexes with more than just two subunits or is interacting non-specifically with the Superdex resin. (B) Estimating Stokes radii of YukeE variants via SEC. Theoretical Stokes radii were estimated from the 3D models of YukeE threaded on the crystal structure of *G. thermodenitrificans* EsxA (PDB ID code 3ZBH) in SOMO software (UltraScan Program Suite) (1–3). (C) Summary of the SEC parameters.

- Brookes E, Demeler B, Rocco M (2010) Developments in the US-SOMO bead modeling suite: New features in the direct residue-to-bead method, improved grid routines, and influence of accessible surface area screening. *Macromol Biosci* 10(7):746–753.
- Brookes E, Demeler B, Rosano C, Rocco M (2010) The implementation of SOMO (SOLUTION MOdeller) in the UltraScan analytical ultracentrifugation data analysis suite: Enhanced capabilities allow the reliable hydrodynamic modeling of virtually any kind of biomacromolecule. *Eur Biophys J* 39(3):423–435.
- Rai N, et al. (2005) SOMO (SOLUTION MOdeler) differences between X-ray- and NMR-derived bead models suggest a role for side chain flexibility in protein hydrodynamics. *Structure* 13(5):723–734.

**Table S1. Summary of tested variants of WXG proteins from different organisms**

| Substitution                             | YukE mutant    | EsxA | EsxB | YukE | Other effects for YukE homologs                                        |
|------------------------------------------|----------------|------|------|------|------------------------------------------------------------------------|
| <b>EsxA <i>M. tuberculosis</i></b>       |                |      |      |      |                                                                        |
| W43R (1)                                 | W44            | +    | +    | -    | Does not pull down EsxB                                                |
| G45T (1)                                 | G46            | +    | +    | -    |                                                                        |
| T2H (1)                                  |                | +    | +    | n/t  |                                                                        |
| Q4L (1)                                  |                | +    | +    | n/t  |                                                                        |
| F8I (1)                                  |                | +    | +    | n/t  |                                                                        |
| A14R (1)                                 |                | +    | +    | n/t  |                                                                        |
| L28A/L29S (1)                            |                | +    | +    | n/t  |                                                                        |
| Q55/Q56A (1)                             |                | +    | +    | n/t  |                                                                        |
| N66I/N67A (1)                            |                | +    | +    | n/t  |                                                                        |
| M83I (1)                                 |                | +    | +    | n/t  |                                                                        |
| V90R (1)                                 |                | +    | +    | n/t  |                                                                        |
| M93T (1)                                 |                | +    | +    | n/t  |                                                                        |
| F94Q (1)                                 |                | +    | +    | n/t  |                                                                        |
| C $\Delta$ 84–96 (1)                     | C $\Delta$ 12  | +    | +    | -    |                                                                        |
| L29D (2, 3)                              |                | n/t  | n/t  | n/t  | Does not heterodimerize                                                |
| G32D (2)                                 |                | n/t  | n/t  | n/t  | Heterodimerizes                                                        |
| A41D (2)                                 |                | n/t  | n/t  | n/t  | Heterodimerizes                                                        |
| L65D (2, 3)                              |                | n/t  | n/t  | n/t  | Does not heterodimerize                                                |
| C $\Delta$ 76–95 (4)                     |                | -    | -    | n/t  | Not detectable in cells                                                |
| N $\Delta$ 3–24 (4)                      |                | -    | -    | n/t  | Not detectable in cells                                                |
| <b>EsxB <i>M. tuberculosis</i></b>       |                |      |      |      |                                                                        |
| S96A (5)                                 |                | +    | +    | n/t  | Heterodimerizes                                                        |
| F100A (5)                                |                | -    | -    | n/t  | Heterodimerizes                                                        |
| M98A (5)                                 |                | -    | -    | n/t  | Heterodimerizes                                                        |
| C $\Delta$ 7 (5)                         |                | -    | -    | -    |                                                                        |
| C $\Delta$ 25 (5)                        |                | -    | -    | n/t  | Not detectable in cells                                                |
| L94A (5)                                 |                |      |      | n/t  | Heterodimerizes                                                        |
| S95A (5)                                 |                |      |      | n/t  | Heterodimerizes                                                        |
| Q97A (5)                                 |                |      |      | n/t  | Heterodimerizes                                                        |
| G99A (5)                                 |                |      |      | n/t  | Heterodimerizes                                                        |
| Y83A (6)                                 | L84A           | -    | -    | n/t  |                                                                        |
| E87A (6)                                 | D88A           | -    | -    | n/t  |                                                                        |
| Y83A/E87A (6)                            | L84A/D88A      | -    | -    | n/t  |                                                                        |
| W43R (3)                                 | W44            | n/t  | n/t  | n/t  | Heterodimerizes                                                        |
| I21R (3)                                 |                | n/t  | n/t  | n/t  | Heterodimerizes                                                        |
| L25R (3)                                 |                | n/t  | n/t  | n/t  | Does not heterodimerize                                                |
| F58R (3)                                 |                | n/t  | n/t  | n/t  | Does not heterodimerize                                                |
| <b>EspA <i>M. tuberculosis</i></b>       |                |      |      |      |                                                                        |
| W55R (7)                                 | W44R           | -    | -    | -    | EspA itself is not secreted                                            |
| G57R (7)                                 | G46R           | -    | -    | -    | EspA itself is not secreted                                            |
| F5R (7)                                  |                | -    | -    |      | Unstable EspA                                                          |
| K41A (7)                                 |                | -    | -    |      | Unstable EspA                                                          |
| F50R (7)                                 | D39R           | -    | -    | n/t  | Unstable EspA; no proper equivalent in YukE                            |
| K62A (7)                                 | A51A           | -    | -    | n/t  | Unstable EspA; no proper equivalent in YukE                            |
| <b>EsxB <i>Bacillus anthracis</i></b>    |                |      |      |      |                                                                        |
| C $\Delta$ 85–90 (8)                     | C $\Delta$ 12  | n/a  | +    | -    |                                                                        |
| C $\Delta$ 81–90 (8)                     | C $\Delta$ 16  | n/a  | -    | n/t  | Not stable                                                             |
| N $\Delta$ 1–6 (8)                       | n/a            | n/a  | +    | n/t  |                                                                        |
| N $\Delta$ 1–11 (8)                      | N $\Delta$ 1–4 | n/a  | -    | n/t  | Not stable                                                             |
| <b>EsxD <i>Staphylococcus aureus</i></b> |                |      |      |      |                                                                        |
| C $\Delta$ 6 (9)                         | n/a            | -    | +    | -    | Secretion of EsxD and EsxB is not affected; EsxA and EsxC—not secreted |
| Y100A, E104A (9)                         | n/a            | +    | +    | n/t  | Esx secretion is not disrupted                                         |

n/a, not applicable; n/t, not tested.

1. Brodin P, et al. (2005) Functional analysis of early secreted antigenic target-6, the dominant T-cell antigen of *Mycobacterium tuberculosis*, reveals key residues involved in secretion, complex formation, virulence, and immunogenicity. *J Biol Chem* 280(40):33953–33959.

2. Meher AK, Bal NC, Chary KV, Arora A (2006) Mycobacterium tuberculosis H37Rv ESAT-6-CFP-10 complex formation confers thermodynamic and biochemical stability. *FEBS J* 273(7): 1445–1462.
3. Meher AK, Lella RK, Sharma C, Arora A (2007) Analysis of complex formation and immune response of CFP-10 and ESAT-6 mutants. *Vaccine* 25(32):6098–6106.
4. Brodin P, et al. (2006) Dissection of ESAT-6 system 1 of Mycobacterium tuberculosis and impact on immunogenicity and virulence. *Infect Immun* 74(1):88–98.
5. Champion PA, Stanley SA, Champion MM, Brown EJ, Cox JS (2006) C-terminal signal sequence promotes virulence factor secretion in Mycobacterium tuberculosis. *Science* 313(5793): 1632–1636.
6. Daleke MH, et al. (2012) General secretion signal for the mycobacterial type VII secretion pathway. *Proc Natl Acad Sci USA* 109(28):11342–11347.
7. Chen JM, et al. (2013) Phenotypic profiling of Mycobacterium tuberculosis EspA point mutants reveals that blockage of ESAT-6 and CFP-10 secretion in vitro does not always correlate with attenuation of virulence. *J Bacteriol* 195(24):5421–5430.
8. Garufi G, Butler E, Missiakas D (2008) ESAT-6-like protein secretion in Bacillus anthracis. *J Bacteriol* 190(21):7004–7011.
9. Anderson M, Aly KA, Chen YH, Missiakas D (2013) Secretion of atypical protein substrates by the ESAT-6 secretion system of Staphylococcus aureus. *Mol Microbiol* 90(4):734–743.

**Table S2. Strains used in this study**

| Name                      | Genotype                                                                                                                              | Source            |
|---------------------------|---------------------------------------------------------------------------------------------------------------------------------------|-------------------|
| <b><i>B. subtilis</i></b> |                                                                                                                                       |                   |
| PY79                      | Laboratory strain that was used as wild-type background for all other strains in this work                                            | B.M.B. laboratory |
| bLH015                    | <i>yukE::erm-Pyuk</i>                                                                                                                 | (1)               |
| bLH045                    | <i>yukE::erm-Pyuk; amyE::kan</i>                                                                                                      | (1)               |
| bLH533                    | <i>yukE::erm-Pyuk; amyE::Phyperspank-yukE (spec)</i>                                                                                  | (1)               |
| bLH530                    | <i>amyE::Phyperspank-yukE (spec)</i>                                                                                                  | (1)               |
| bTS033                    | <i>yukE::erm-Pyuk; amyE::Phyperspank-yukEW44A (spec)</i>                                                                              | This work         |
| bTS040                    | <i>yukE::erm-Pyuk; amyE::Phyperspank-yukEW44G (spec)</i>                                                                              | This work         |
| bTS041                    | <i>yukE::erm-Pyuk; amyE::Phyperspank-yukEW44Y (spec)</i>                                                                              | This work         |
| bTS034                    | <i>yukE::erm-Pyuk; amyE::Phyperspank-yukEW44F (spec)</i>                                                                              | This work         |
| bTS035                    | <i>yukE::erm-Pyuk; amyE::Phyperspank-yukEW44E (spec)</i>                                                                              | This work         |
| bTS036                    | <i>yukE::erm-Pyuk; amyE::Phyperspank-yukEW44R (spec)</i>                                                                              | This work         |
| bTS037                    | <i>yukE::erm-Pyuk; amyE::Phyperspank-yukEW44P (spec)</i>                                                                              | This work         |
| bTS042                    | <i>yukE::erm-Pyuk; amyE::Phyperspank-yukEE45A (spec)</i>                                                                              | This work         |
| bTS043                    | <i>yukE::erm-Pyuk; amyE::Phyperspank-yukEE45G (spec)</i>                                                                              | This work         |
| bTS038                    | <i>yukE::erm-Pyuk; amyE::Phyperspank-yukEE45K (spec)</i>                                                                              | This work         |
| bTS044                    | <i>yukE::erm-Pyuk; amyE::Phyperspank-yukEE45R (spec)</i>                                                                              | This work         |
| bTS047                    | <i>yukE::erm-Pyuk; amyE::Phyperspank-yukEE45D (spec)</i>                                                                              | This work         |
| bTS045                    | <i>yukE::erm-Pyuk; amyE::Phyperspank-yukEE45Q (spec)</i>                                                                              | This work         |
| bTS039                    | <i>yukE::erm-Pyuk; amyE::Phyperspank-yukEG46A (spec)</i>                                                                              | This work         |
| bTS049                    | <i>yukE::erm-Pyuk; amyE::Phyperspank-yukEG46P (spec)</i>                                                                              | This work         |
| bTS048                    | <i>yukE::erm-Pyuk; amyE::Phyperspank-yukEG46R (spec)</i>                                                                              | This work         |
| bTS125                    | <i>yukE::erm-Pyuk; amyE::Phyperspank-yukET8C (spec)</i>                                                                               | This work         |
| bTS126                    | <i>yukE::erm-Pyuk; amyE::Phyperspank-yukEK17C (spec)</i>                                                                              | This work         |
| bTS127                    | <i>yukE::erm-Pyuk; amyE::Phyperspank-yukEV21C (spec)</i>                                                                              | This work         |
| bTS129                    | <i>yukE::erm-Pyuk; amyE::Phyperspank-yukES62C (spec)</i>                                                                              | This work         |
| bTS131                    | <i>yukE::erm-Pyuk; amyE::Phyperspank-yukEQ75C (spec)</i>                                                                              | This work         |
| bTS130                    | <i>yukE::erm-Pyuk; amyE::Phyperspank-yukEN82C (spec)</i>                                                                              | This work         |
| bTS133                    | <i>yukE::erm-Pyuk; amyE::Phyperspank-yukET8C/Q75C (spec)</i>                                                                          | This work         |
| bTS134                    | <i>yukE::erm-Pyuk; amyE::Phyperspank-yukEK17C/N82C (spec)</i>                                                                         | This work         |
| bTS135                    | <i>yukE::erm-Pyuk; amyE::Phyperspank-yukEK17C/S62C (spec)</i>                                                                         | This work         |
| bTS136                    | <i>yukE::erm-Pyuk; amyE::Phyperspank-yukEV21C/S62C (spec)</i>                                                                         | This work         |
| bTS188                    | <i>yukE::erm-Pyuk; amyE::Phyperspank-yukECA1 (spec)</i>                                                                               | This work         |
| bTS189                    | <i>yukE::erm-Pyuk; amyE::Phyperspank-yukECA2 (spec)</i>                                                                               | This work         |
| bTS058                    | <i>yukE::erm-Pyuk; amyE::Phyperspank-yukECA3 (spec)</i>                                                                               | This work         |
| bTS059                    | <i>yukE::erm-Pyuk; amyE::Phyperspank-yukECA5 (spec)</i>                                                                               | This work         |
| bTS060                    | <i>yukE::erm-Pyuk; amyE::Phyperspank-yukECA7 (spec)</i>                                                                               | This work         |
| bTS061                    | <i>yukE::erm-Pyuk; amyE::Phyperspank-yukECA10 (spec)</i>                                                                              | This work         |
| bTS062                    | <i>yukE::erm-Pyuk; amyE::Phyperspank-yukECA12 (spec)</i>                                                                              | This work         |
| bTS064                    | <i>yukE::erm-Pyuk; amyE::Phyperspank-yukECA15 (spec)</i>                                                                              | This work         |
| bTS109                    | <i>amyE::Phyperspank-yukECA5 (spec)</i>                                                                                               | This work         |
| bTS110                    | <i>amyE::Phyperspank-yukECA7 (spec)</i>                                                                                               | This work         |
| bTS111                    | <i>amyE::Phyperspank-yukECA10 (spec)</i>                                                                                              | This work         |
| bTS112                    | <i>amyE::Phyperspank-yukECA12 (spec)</i>                                                                                              | This work         |
| bTS114                    | <i>amyE::Phyperspank-yukECA15 (spec)</i>                                                                                              | This work         |
| bTS241                    | <i>yukE::erm-Pyuk; amyE::Phyperspank-yukECA5/S62C (spec)</i>                                                                          | This work         |
| bTS242                    | <i>yukE::erm-Pyuk; amyE::Phyperspank-yukECA7/S62C (spec)</i>                                                                          | This work         |
| bTS243                    | <i>yukE::erm-Pyuk; amyE::Phyperspank-yukECA10/S62C (spec)</i>                                                                         | This work         |
| bTS245                    | <i>yukE::erm-Pyuk; amyE::Phyperspank-yukECA15/S62C (spec)</i>                                                                         | This work         |
| bTS282                    | <i>yukE::erm-Pyuk; amyE::Phyperspank-yukEW44A/S62C (spec)</i>                                                                         | This work         |
| bTS283                    | <i>yukE::erm-Pyuk; amyE::Phyperspank-yukEE45A/S62C (spec)</i>                                                                         | This work         |
| bTS284                    | <i>yukE::erm-Pyuk; amyE::Phyperspank-yukEG46A/S62C (spec)</i>                                                                         | This work         |
| <b><i>E. coli</i></b>     |                                                                                                                                       |                   |
| DH5 $\alpha$              | F- $\phi$ 80lacZ $\Delta$ M15 $\Delta$ (lacZYA-argF) U169 recA1 endA1 hsdR17 (rK-, mK+)<br>phoA supE44 $\lambda$ - thi-1 gyrA96 relA1 | Invitrogen        |
| BL21(DE3)                 | F- ompT hsdSB(rB-, mB-) gal dcm (DE3)                                                                                                 | EMD               |
| eTS026                    | BL21(DE3) pET28-his-yukE                                                                                                              | This work         |
| eTS279                    | BL21(DE3) pET28-his-yukECA5                                                                                                           | This work         |
| eTS283                    | BL21(DE3) pET28-his-yukECA15                                                                                                          | This work         |

Table S2. Cont.

| Name   | Genotype                     | Source    |
|--------|------------------------------|-----------|
| eTS420 | BL21(DE3) pET28-his-yukEW44A | This work |
| eTS421 | BL21(DE3) pET28-his-yukEE45A | This work |
| eTS422 | BL21(DE3) pET28-his-yukEG46A | This work |

1. Huppert LA, et al. (2014) The ESX system in *Bacillus subtilis* mediates protein secretion. *PLoS ONE*, 10.1371/journal.pone.0096267.

Table S3. Oligonucleotides used in this study

| Name                                                        | Sequence 5'→3'                                      | Description    | Source    |
|-------------------------------------------------------------|-----------------------------------------------------|----------------|-----------|
| <b>Cloning <i>yukE</i> into pET28b(+) vector (Novagen)</b>  |                                                     |                |           |
| oTS010                                                      | agataacatgagcaggattaattcgtgtcac                     | Forward, NdeI  | This work |
| oTS012                                                      | attggatccatactgttatccgaggatttg                      | Reverse, BamHI | This work |
| <b>Mutagenesis of <i>B. subtilis</i> integration vector</b> |                                                     |                |           |
| oTS130                                                      | cgcaaatcaaatccgctaaggataagctagccgca                 | yukECΔ1        | This work |
| oTS131                                                      | caagacatcgcaaatcaaatcaacgagataagctag                | yukECΔ2        | This work |
| oTS075                                                      | ccaagacatcgcaaatcaataagctagccgcatgcaag              | yukECΔ3        | This work |
| oTS076                                                      | cttgcatgaggctgatttattgattgcatgattcttg               | yukECΔ3        | This work |
| oTS077                                                      | tgaccaagacatcgcataagctagccgcatgc                    | yukECΔ5        | This work |
| oTS078                                                      | gcatgaggctagcttatgcatgcttggca                       | yukECΔ5        | This work |
| oTS079                                                      | gtctactgaccaagactaagctagccgcatgc                    | yukECΔ7        | This work |
| oTS080                                                      | gcatgaggctagcttagcttggctagtagac                     | yukECΔ7        | This work |
| oTS081                                                      | caaatcacttgagctacttaagctagccgcatgcaagc              | yukECΔ10       | This work |
| oTS082                                                      | gcttgatgaggctagcttaagtagactaagtgatttg               | yukECΔ10       | This work |
| oTS083                                                      | aacagcaaatcacttgagtaagctagccgcatgcaag               | yukECΔ12       | This work |
| oTS084                                                      | cttgcatgaggctagcttactcaagtgatttggctgt               | yukECΔ12       | This work |
| oTS087                                                      | tcagcagcttgatcaaacagcaaatagctagccgcat               | yukECΔ15       | This work |
| oTS088                                                      | atgaggctagcttaatttggctttgatcaagctgctga              | yukECΔ15       | This work |
| oTS037                                                      | ctctgatttgaagcagctgagcgaaggtgctcaagcgaa             | yukEW44A       | This work |
| oTS038                                                      | ctctgatttgaagcagctggcgaaggtgctcaagcgaa              | yukEW44G       | This work |
| oTS039                                                      | ctctgatttgaagcagctgtagaaggtgctcaagcgaa              | yukEW44Y       | This work |
| oTS040                                                      | ctctgatttgaagcagctgtagaaggtgctcaagcgaa              | yukEW44F       | This work |
| oTS041                                                      | gatctctgatttgaagcagctgtagaaggtgctcaagcgaa           | yukEW44E       | This work |
| oTS042                                                      | ctctgatttgaagcagctgtagaaggtgctcaagcgaa              | yukEW44R       | This work |
| oTS043                                                      | ctctgatttgaagcagctgtagaaggtgctcaagcgaa              | yukEW44P       | This work |
| oTS052                                                      | gatttgaagcagctgtagaaggtgctcaagcgaa                  | yukEE45A       | This work |
| oTS053                                                      | gatttgaagcagctgtagaaggtgctcaagcgaa                  | yukEE45G       | This work |
| oTS054                                                      | gatttgaagcagctgtagaaggtgctcaagcgaa                  | yukEE45K       | This work |
| oTS055                                                      | tctgatttgaagcagctgtagaaggtgctcaagcgaa               | yukEE45R       | This work |
| oTS056                                                      | gatttgaagcagctgtagaaggtgctcaagcgaa                  | yukEE45Q       | This work |
| oTS057                                                      | gatttgaagcagctgtagaaggtgctcaagcg                    | yukEE45D       | This work |
| oTS058                                                      | tgaaagcagctgtagaaggtgctcaagcgaa                     | yukEG46A       | This work |
| oTS059                                                      | tgatttgaagcagctgtagaaggtgctcaagcgaa                 | yukEG46P       | This work |
| oTS044                                                      | ggcaggattaattcgtgtctgcccgaagagctaagagcga            | yukET8C        | This work |
| oTS045                                                      | gagctaagagcagctgtagaaggtgctcaagcgaa                 | yukEK17C       | This work |
| oTS046                                                      | agcagtagcgaagcaatacggctgcaagcaagaagtataaatc         | yukEV21C       | This work |
| oTS049                                                      | gatcaatacagcagctcaaaccttctttatacaaatgtcagattgcttc   | yukES62C       | This work |
| oTS050                                                      | atgtcagatttctcaagatgtaattgccagcttgatcaaacagcaaatcac | yukEQ75C       | This work |
| oTS051                                                      | aatcagcagcttgatcaaacagcagctgacacttgagctactgaccaag   | yukEN82C       | This work |
| <b>Mutagenesis of <i>E. coli</i> expression vector</b>      |                                                     |                |           |
| oTS137                                                      | ctgaccaagacatcgataaaatcaaatccgagata                 | yukECΔ5        | This work |
| oTS141                                                      | aatcagcagcttgatcaaacagcaaatcaaaccttgagctctac        | yukECΔ15       | This work |
